# Supplementary material for: BAX inhibitor-1-associated V-ATPase glycosylation enhances collagen degradation in pulmonary fibrosis
Source: PubMed Central journal article supplement — Cell Death Dis. 2014 Mar 13;5(3):e1113–. doi: 10.1038/cddis.2014.86 (PMC3973240; doi:10.1038/cddis.2014.86), 2014-03-13

# Supplementary Figure 1

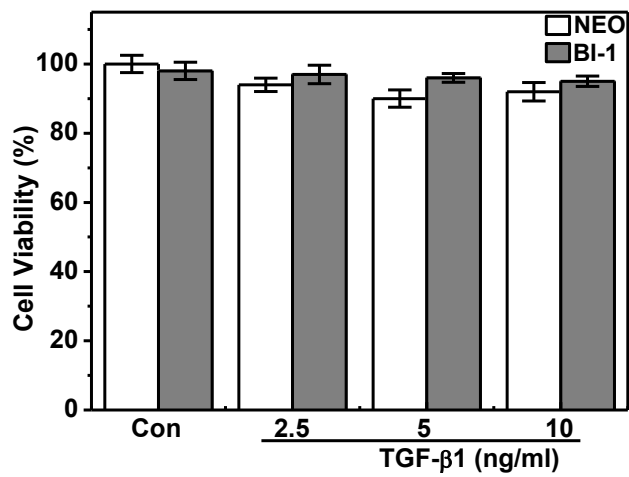

# Supplementary Figure 2

**a**

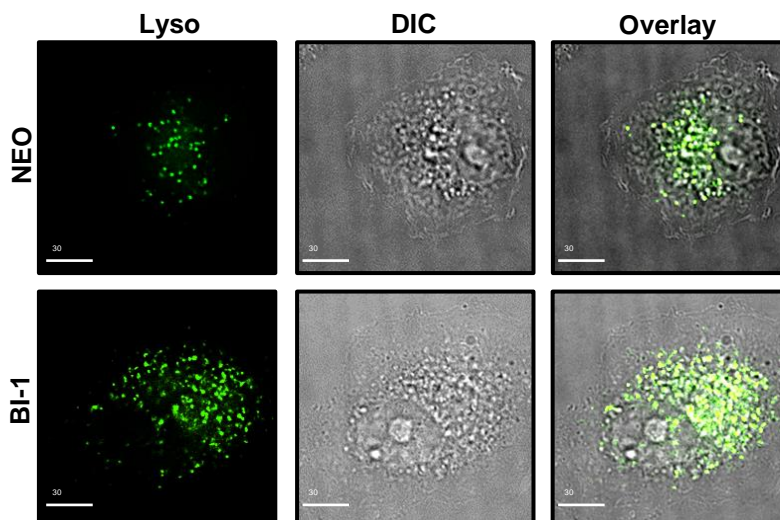

**b**

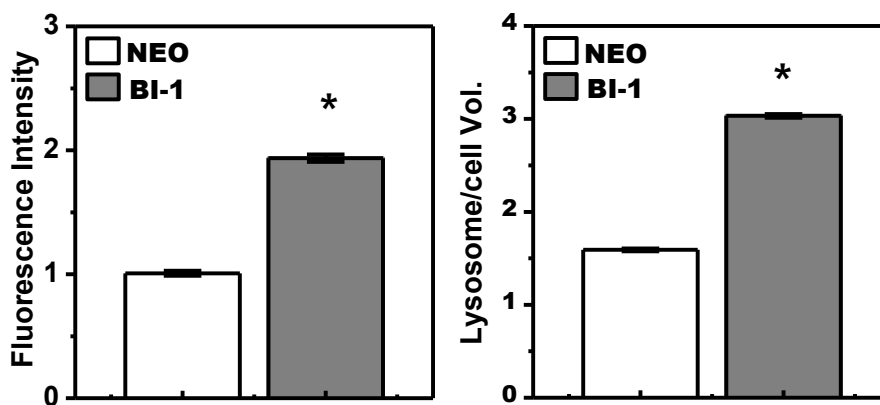

# Supplementary Figure 3

**a**

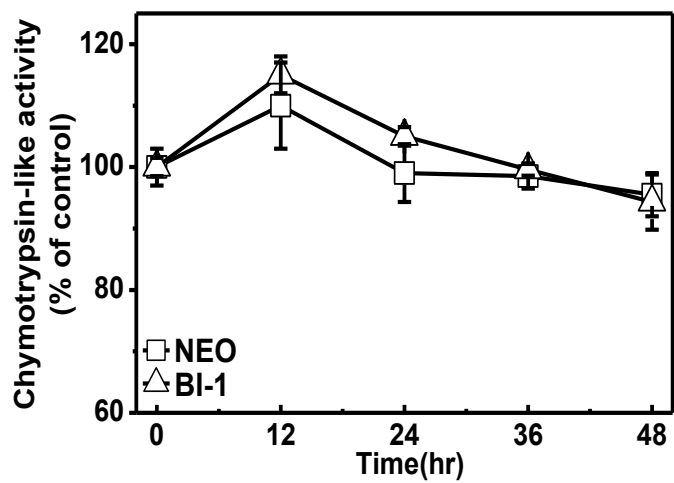

**b**

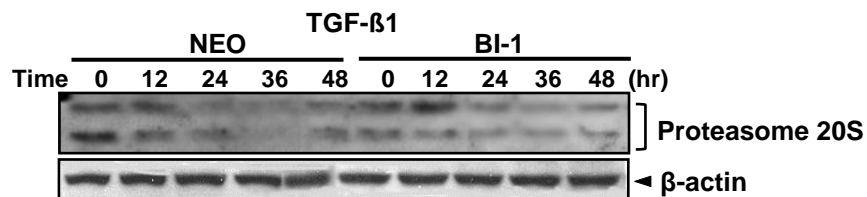

# Supplementary Figure 4

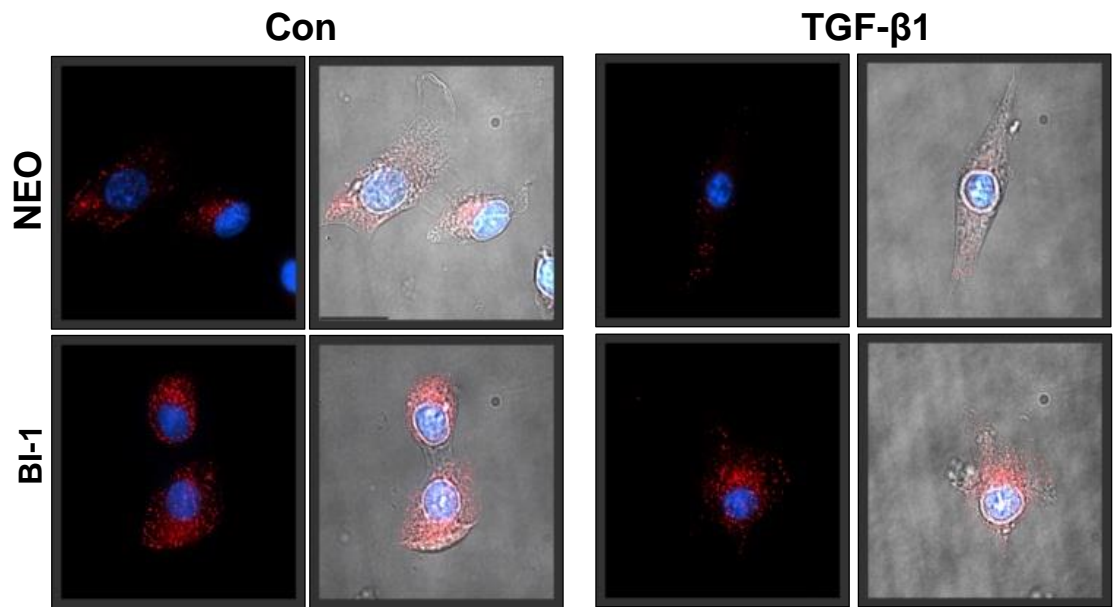

# Supplementary Figure 5

**a**

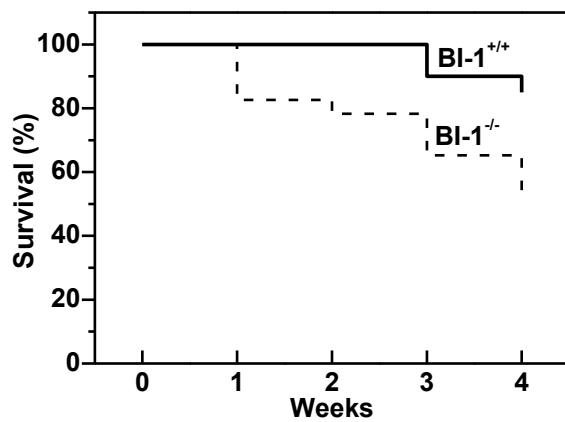

**b**

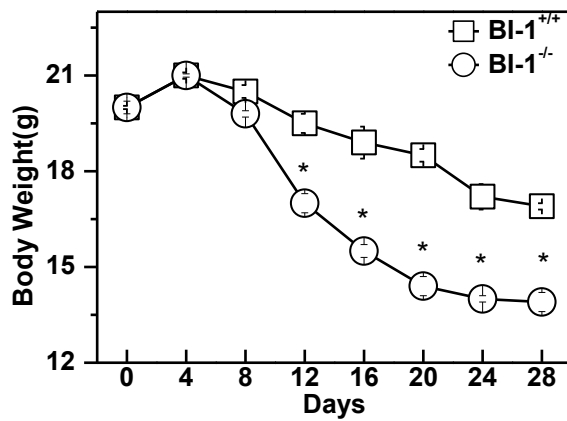

# Supplementary Figure 6

**a**

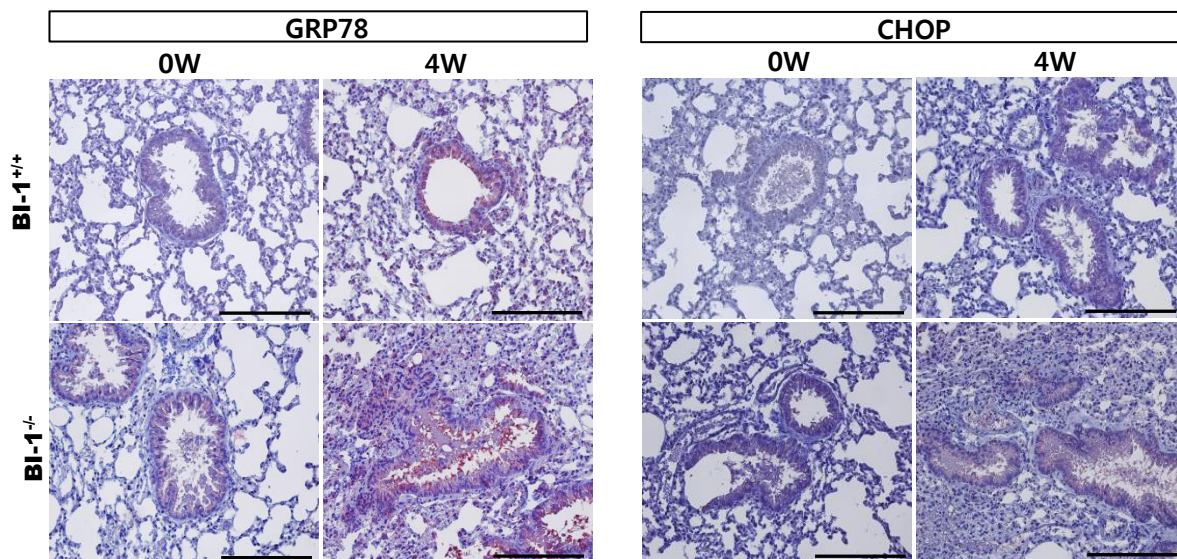

**b**

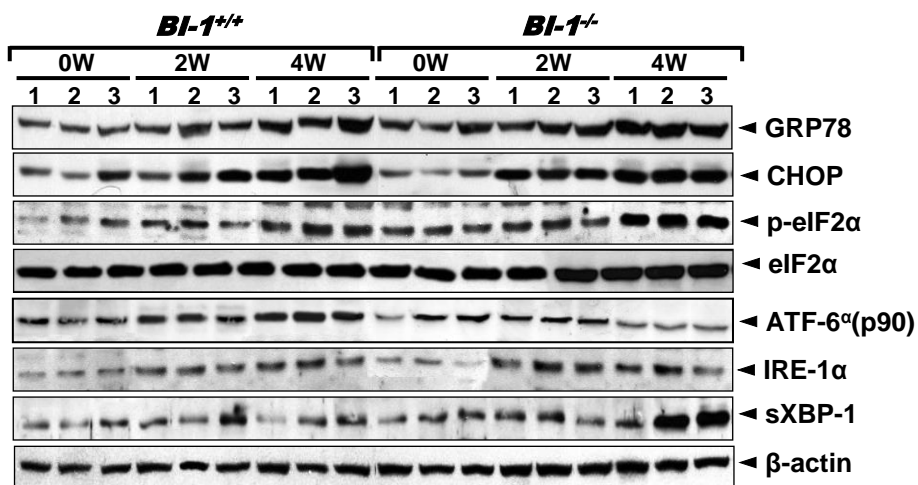

# Supplementary Figure 7

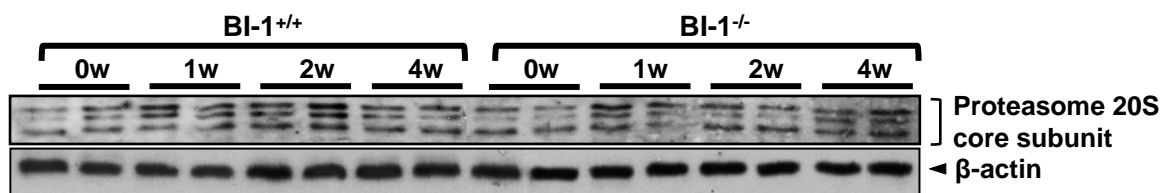

Supplement: cddis201486x1.pdf [file cddis201486x1.pdf]
